# Supplementary material
Source: PubMed Central journal article supplement (PMC3049430)

# BAG3 mediates chaperone-based aggresome-targeting and selective autophagy of misfolded proteins

Martin Gamerdinger, A. Murat Kaya, Uwe Wolfrum, Albrecht M. Clement and Christian Behl

## Supplementary Information

### Methods

#### Plasmids.

Expression plasmids for untagged human BAG3 (pBAG3-N1), human BAG3 fused to EGFP (pBAG3.EGFP-N1), EGFP-tagged SOD1 constructs (SOD<sup>G85R</sup>-GFP and SOD<sup>WT</sup>-GFP) and HA fused to ubiquitin (HA-Ubiquitin) were described previously (Gamerdinger et al, 2009; Lim et al, 2005; Witan et al, 2008).

FLAG-tagged BAG3 (FLAG-BAG3) and FLAG-tagged BAG3 deletion mutants (FLAG-BAG-domain and FLAG-PxxP-BAG-domain) were constructed by PCR amplification of corresponding DNA fragments using pBAG3-N1 as a template. HA-tagged Hsp70 (HA-Hsp70) and FLAG-tagged p50 (FLAG-p50) DNA fragments were obtained by PCR amplification using pEGFP-Hsp70 (Zeng et al, 2004) and cDNA from HEK cells, respectively, as templates. All DNA fragments were inserted into pEGFP-N1 vector (Clontech, Mountain View, CA, USA), in which the EGFP gene was removed.

The FLAG-tagged BAG3 deletion construct lacking the BAG domain (amino acids 421-498; FLAG-( $\Delta$ 421-498)-BAG3) was cloned using the Quikchange lightning site-directed mutagenesis kit (Agilent Technologies, Santa Clara, CA, USA) and FLAG-BAG3 as a template.

The GST plasmid was obtained by cloning the GST gene from pGEX (GE Healthcare, Munich, Germany) into the pEF-Bos-ex vector (Murai et al, 1998). To obtain the GST-DIC plasmid, the dynein intermediate chain 1 (transcript variant 2) CDS was amplified by PCR using HEK cDNA as a template and cloned into the GST plasmid.

#### Cell culture

Human embryonic kidney 293 cells (HEK, 293), African green monkey kidney Cos7 cells and primary human fibroblasts (IMR90) were cultured in Dulbecco modified Eagle medium supplemented with 1 mM sodium pyruvate, 10% fetal bovine serum, 1  $\times$  nonessential amino acids, 100 U/ml penicillin and 100 U/ml streptomycin at 37°C in a 5% CO<sup>2</sup>-humidified atmosphere.

#### Dynein GST pull-down analysis.

The interaction of cytoplasmic proteins with the dynein motor complex was analyzed as previously described (Ström et al, 2008) with some modifications. In brief, cells transfected with GST or GST-DIC were lysed in RIPA buffer (50 mM Tris-HCl pH: 7.4, 150 mM NaCl, 1 mM EDTA, 0.25% Na-deoxycholate, 1% NP-40, 0.1% SDS) for 15 min on ice. Cell lysates were cleared by centrifugation at 1,000  $\times$  g for 10 min at 4°C. For GST pull-down, 400  $\mu$ l of lysate (~1  $\mu$ g/ $\mu$ l protein) were incubated with 50  $\mu$ l of a 50% slurry of glutathione-Sepharose 4B (GE Healthcare, Munich, Germany) in low-retention tubes (Kisker-Biotech, Steinfurt, Germany) for 2 h at 4°C with end-over-end rotation. The glutathione beads were then collected by centrifugation at 500  $\times$  g for 5 min at 4°C and washed two times with ice-cold RIPA and one time with RIPA lacking SDS. The bound proteins were then released by boiling for 5 min at 99°C in 2x SDS-PAGE loading buffer (10% SDS, 20% glycerine, 125 mM Tris, 1 mM EDTA, 0.002% bromophenol blue and 10%  $\beta$ -mercaptoethanol) for subsequent immunoblot analysis.

#### Sucrose density gradient analysis.

For small scale sucrose density gradient analysis, cells were lysed on ice for 20 min in NP40 buffer (25 mM HEPES-KOH pH: 7.4, 150 mM NaCl, 2 mM EDTA, 1% NP40, 0.5 mM DTT, 1% protease inhibitor mix, 1% phosphatase inhibitor mix). After centrifugation (18.000  $\times$  g, 30 min, 4°C) 100  $\mu$ l of the supernatant (200  $\mu$ g total protein) were loaded on the top of a 2 ml linear 5-20% sucrose gradient prepared in a buffer containing 25 mM HEPES-KOH pH: 7.4, 150 mM NaCl, 2 mM EDTA, 0.5% NP40, 0.5 mM DTT. After ultracentrifugation (55.000 rpm) in a TLS-55 rotor (BeckmannCoulter, Krefeld, Germany) for 2 h at 4°C, 14 fractions of 150  $\mu$ l were collected beginning at the top of the gradient. Subsequently, 10 and 50  $\mu$ l of each fraction were directly subjected to immunoblot and GST pull-down analysis, respectively. Detection of endogenous 20S proteasome complex served as 20S migration marker on sucrose density gradients.

### Immunohistochemistry.

Spinal cords from 4% PFA-perfused mice were cut on a cryostat (Leica microsystems, Wetzlar, Germany) to 10-15  $\mu\text{m}$  thick sections. Prior to immunostaining, free floating sections were quenched as previously described (Sun et al, 2002) to reduce autofluorescence. For immunostaining sections were incubated for 1-2 h at RT in PBS/0.5% Triton-X100 (PBS-T) containing 3% bovine serum albumin to block unspecific antibody binding sites. Sections were then incubated with BAG3 antibody (Proteintech Group, Chicago, IL, USA) in PBS-T overnight at 4°C with gentle agitation. After washing two times with PBS-T, sections were incubated with Cy3-conjugated secondary antibody (donkey anti-rabbit, Jackson ImmunoResearch, Newmarket, UK) in PBS-T for 2 h at RT. The sections were then washed two times with PBS-T and incubated for 2 h at RT with 1  $\mu\text{g}/\mu\text{l}$  rabbit IgG antibody solution (Sigma, Schnellendorf, Germany) to block free binding domains of the secondary antibody. Subsequently, sections were incubated with rabbit monoclonal SOD1 (Epitomics, Burlingame, CA, USA) coupled to DyeLight NHS649 (Thermo Scientific, Bonn, Germany) in PBS-T for 2 h at RT. After washing two times with PBS-T, sections were mounted onto glass slides with ProLong antifade reagent (Invitrogen, Darmstadt, Germany) and visualized on a confocal laser-scanning microscope (Carl Zeiss, Jena, Germany).

| Antibodies                                 | Host   | Supplier                       |
|--------------------------------------------|--------|--------------------------------|
| FLAG                                       | rabbit | Sigma, F7425                   |
| FLAG                                       | mouse  | Sigma, F3165                   |
| HA                                         | rabbit | Sigma, H6908                   |
| BAG1 (cBAG)                                | rabbit | Gamerdinger et al., 2009       |
| BAG2                                       | rabbit | Epitomics, 2610-1              |
| BAG3                                       | rabbit | Proteintech Group, 10599-1-AP  |
| BAG5                                       | rabbit | Novus Biologicals, NB100-56091 |
| GST                                        | mouse  | Sigma, G1160                   |
| GFP                                        | mouse  | Covance, MMS-118P              |
| Hsp70                                      | mouse  | Stressgen, C92F3A-5            |
| Hsc/Hsp70                                  | mouse  | Stressgen, SPA-820             |
| Vimentin                                   | rabbit | Santa Cruz, sc-5565            |
| p62/SQSTM1                                 | mouse  | Santa Cruz, sc-28359           |
| p62/SQSTM1 (used in mouse tissue analysis) | rabbit | Sigma, P0067                   |
| NBR1                                       | rabbit | Sigma, HPA022999               |
| LAMP1                                      | rat    | BD Pharmingen, 553792          |
| LAMP2                                      | mouse  | abcam, ab25631                 |
| Atg7                                       | rabbit | Sigma, A2856                   |
| LC3                                        | rabbit | Sigma, L7543                   |
| Dynactin (p150 <sup>Glued</sup> )          | rabbit | Santa Cruz, sc-11363           |
| Dynein (intermediate chain)                | mouse  | Sigma, D5167                   |
| 20S proteasome subunit $\alpha$ 1          | rabbit | Santa Cruz, sc-67046           |
| SOD1                                       | rabbit | Epitomics, 2018-1              |
| Ubiquitin                                  | rabbit | Dako, Z0458                    |
| Poly-Ubiquitin (FK1)                       | mouse  | Biomol, PW8805                 |
| Histone H3                                 | mouse  | Abcam, ab6000                  |
| Actin                                      | rabbit | Sigma, A5060                   |
| Tubulin                                    | mouse  | Sigma, T9026                   |
| Gapdh                                      | mouse  | abcam, ab9482                  |

## Supplementary References

Gamerding M, Hajieva P, Kaya AM, Wolfrum U, Hartl FU & Behl C (2009) Protein quality control during aging involves recruitment of the macroautophagy pathway by BAG3. *EMBO J.* **28**: 889–901

Lim KL, Chew KC, Tan JM, Wang C, Chung KK, Zhang Y, Tanaka Y, Smith W, Engelender S, Ross CA, Dawson VL & Dawson TM (2005) Parkin mediates nonclassical, proteasomal-independent ubiquitination of synphilin-1: implications for Lewy body formation. *J. Neurosci.* **25**: 2002–2009.

Murai K, Murakami H & Nagata S (1998) Myeloid-specific transcriptional activation by murine myeloid zinc-finger protein 2. *Proc. Natl. Acad. Sci. U.S.A.* **95**: 3461–3466

Ström A, Shi P, Zhang F, Gal J, Kilty R, Hayward LJ & Zhu H (2008) Interaction of amyotrophic lateral sclerosis (ALS)-related mutant copper-zinc superoxide dismutase with the dynein-dynactin complex contributes to inclusion formation. *J. Biol. Chem.* **283**: 22795–22805

Sun A, Nguyen XV & Bing G (2002) Comparative analysis of an improved thioflavin-s stain, Gallyas silver stain, and immunohistochemistry for neurofibrillary tangle demonstration on the same sections. *J. Histochem. Cytochem.* **50**: 463–472

Witan H, Kern A, Koziollek-Drechsler I, Wade R, Behl C & Clement AM (2008) Heterodimer formation of wild-type and amyotrophic lateral sclerosis-causing mutant Cu/Zn-superoxide dismutase induces toxicity independent of protein aggregation. *Hum. Mol. Genet.* **17**: 1373–1385

Zeng X, Bhasin S, Wu X, Lee J, Maffi S, Nichols CJ, Lee KJ, Taylor JP, Greene LE & Eisenberg E (2004) Hsp70 dynamics in vivo: effect of heat shock and protein aggregation. *J. Cell. Sci.* **117**: 4991–5000

## Supplementary Figure legends

**Fig. S1** (A) Immunoblot analysis of BAG family proteins in Cos7 cells treated for 12 h with the proteasome inhibitor MG132 (25  $\mu$ M) in the absence and the presence of the microtubule-depolymerizing agent vinblastine (25  $\mu$ M). (B) Densitometric quantification of dot blot analyses as presented in Fig. 1G. Diagrams display the ratios between 0.5% NP40-insoluble and soluble ubiquitinated protein species in nonsense (nons) and bag3 siRNA transfected cells treated with MG132 (25  $\mu$ M, 12 h) or DMSO as vehicle control.  $**p < 0.01$ ,  $n = 3$ . (C) Same analysis as shown in Fig. 1G and S1B but with primary human IMR90 cells and the proteasome inhibitor lactacystin. (D) Cos7 cells were transfected for 24 h with nonsense (nons) or bag3 siRNA and treated with MG132 (25  $\mu$ M, 12 h). Aggresomes were visualized by ubiquitin immunostaining. Scale Bar: 50  $\mu$ m. (E) and (F) Immunofluorescence staining of ubiquitin (E) and vimentin (F) in Cos7 cells transfected with BAG3 fused to GFP (BAG3-GFP) and treated as in (A). Arrows point to ubiquitin- and BAG3-GFP-positive micro-aggregates (diameter  $\leq 1 \mu$ m) dispersed throughout the cytoplasm. Sytox orange was used to stain nuclei (pseudo-colored in blue). Scale bar: 10  $\mu$ m. (G) Representative immunofluorescence images of analysis presented in Fig. 1E, F (H). ctrl, control; BafA1, bafilomycin A1. Scale Bar: 50  $\mu$ m. (H) Cells were treated as in (Fig 1E) but 4 h after MG132 wash out, bafilomycin A1 (BafA1, 5  $\mu$ M) was added for 20 h to inhibit aggresome clearance. Diagram shows the mean size of aggresomes. Images are shown in Fig S1G.

**Fig. S2** (A) Protein extracts from cells transfected for 18 h with GST or GST fused to dynein intermediate chain (GST-DIC) were fractionated on a 5-20% linear sucrose gradient by ultracentrifugation. The levels of endogenous dynein intermediate chain (DIC) and p150<sup>Glued</sup> as well as the expressed GST and GST-DIC were then examined in each collected fraction by Western-blot analysis. Migration of a 20S marker protein is indicated. (B) BAG3 co-immunoprecipitation (IP) analysis of Cos7 cells treated with the proteasome inhibitor MG132 (25  $\mu$ M, 12 h). The obtained BAG3 immunocomplexes were analyzed for the presence of co-precipitated endogenous dynein intermediate chain (DIC). Purified rabbit (rb) IgG was used as negative control for IP. Left panel shows relative amounts of proteins in lysates used for Co-IP. (C) IMR90 cells were transfected with FLAG-tagged full-length BAG3 (FLAG-BAG3) or FLAG-tagged BAG deletion mutant lacking the BAG domain (FLAG-( $\Delta$ 421-498)-BAG3). Co-immunoprecipitation (IP) analysis with FLAG antibodies was performed using rabbit IgG (rb IgG) as negative control. Left panel shows relative amounts of proteins in cell lysates used for Co-IP. Right panel shows levels of Hsc/Hsp70 and FLAG-tagged proteins in FLAG immunoprecipitates. (D) Representative microscope images of HEK cells transfected for 18 h with SOD<sup>WT</sup>-GFP along with FLAG-tagged BAG3 (FLAG-BAG3) and HA-tagged Hsp70 (HA-Hsp70), as indicated. Scale bar: 10  $\mu$ m. (E) d2HEK cells, which stably express the GFP-based proteasome reporter d2GFP (Gamerding et al, 2009), were transfected with HA-tagged ubiquitin (HA-Ubiquitin) and 6 h after transfection treated with the E1 inhibitor PYR-41 (10  $\mu$ M, 12 h) to block ubiquitination. GFP fusion proteins were then immunoprecipitated and analyzed for HA immunoreactivity. Lower panel shows relative amounts of proteins in total lysates. (F) Microscope images of cells transfected as in (Fig 2B) showing altered localization of SOD<sup>G85R</sup>-GFP. Scale bar: 10  $\mu$ m.

**Fig. S3** (A)-(E) Immunofluorescence images showing entire cells and single fluorescence channels from analysis presented in Fig. 3A. Arrows in (D) and (E) point to clusters of LC3-positive autophagosomes and LAMP2-positive lysosomes, respectively, which co-localize with mtSOD in the aggresome. Scale bar: 10  $\mu$ m. (F) Representative immunoblot of data displayed in the diagram of Fig. 3F. (G) Immunoblot analysis of spinal cord extracts from non-transgenic (nTg), SOD<sup>WT</sup> (WT) and mtSOD (G93A, G85R, both at endstage) mice. Left panel shows relative levels of indicated proteins in total lysates. Right panel shows the relative levels of these proteins after enrichment of aggregates by differential centrifugation.

# Figure S1

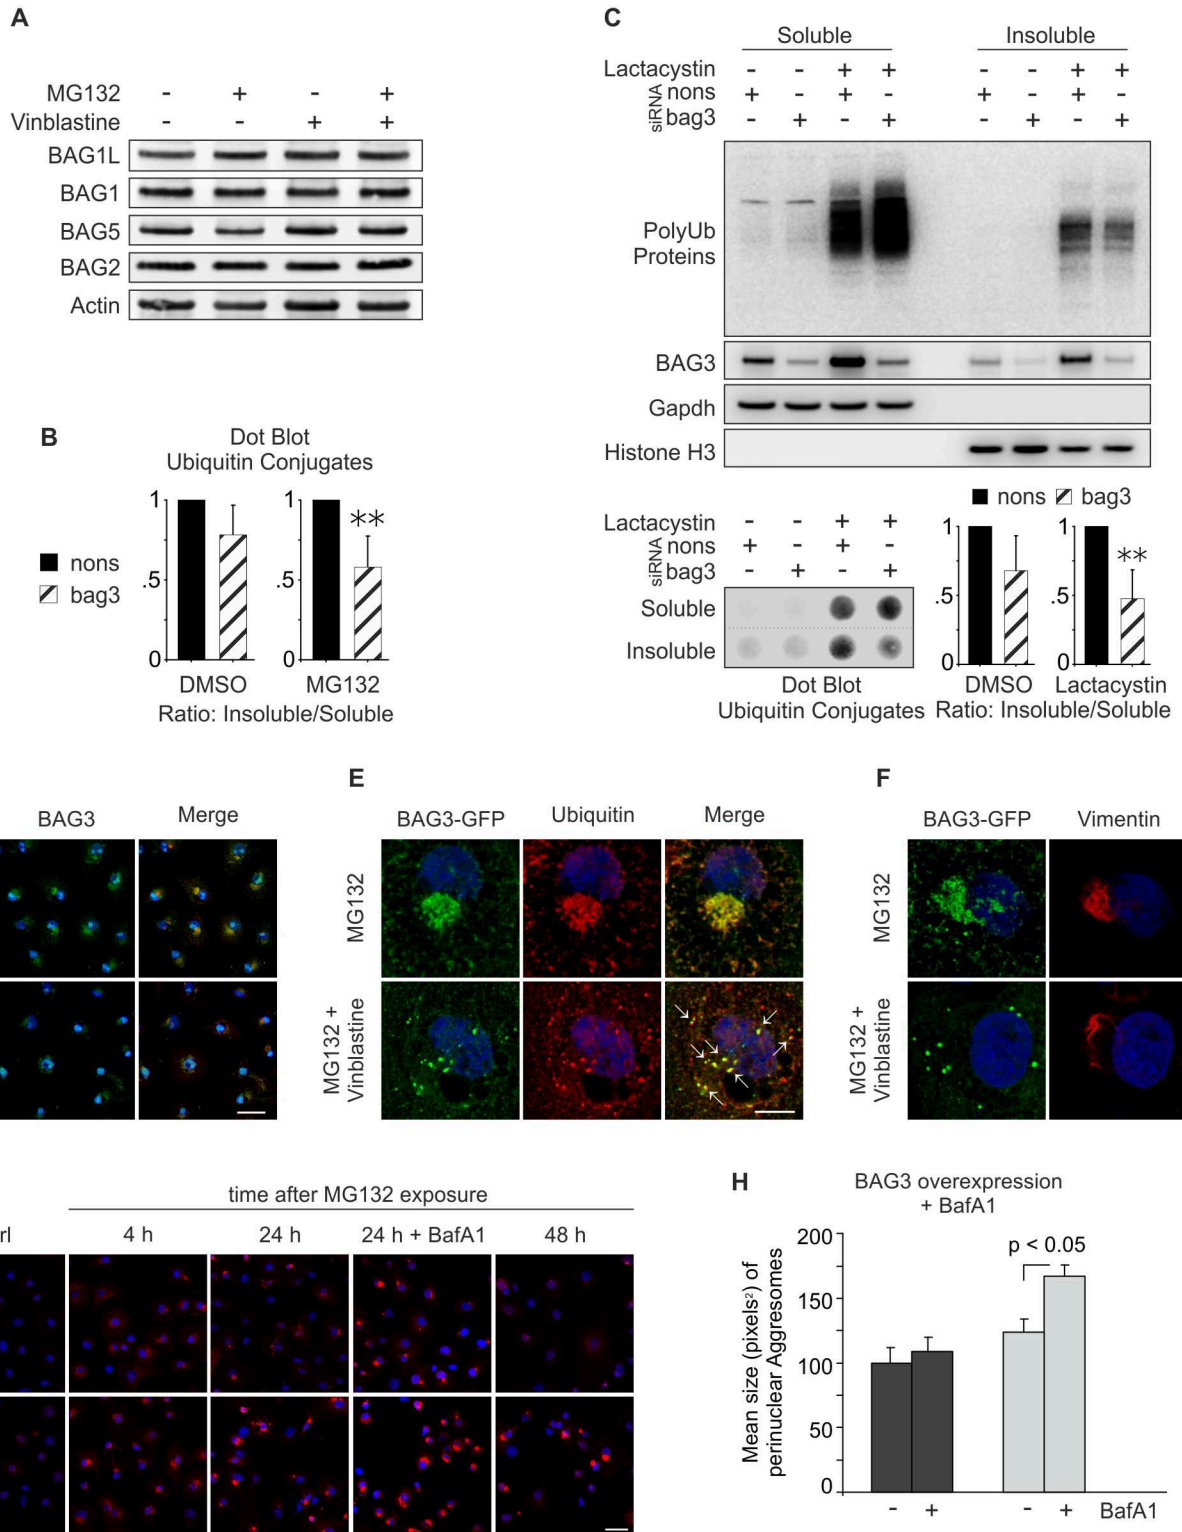

# Figure S2

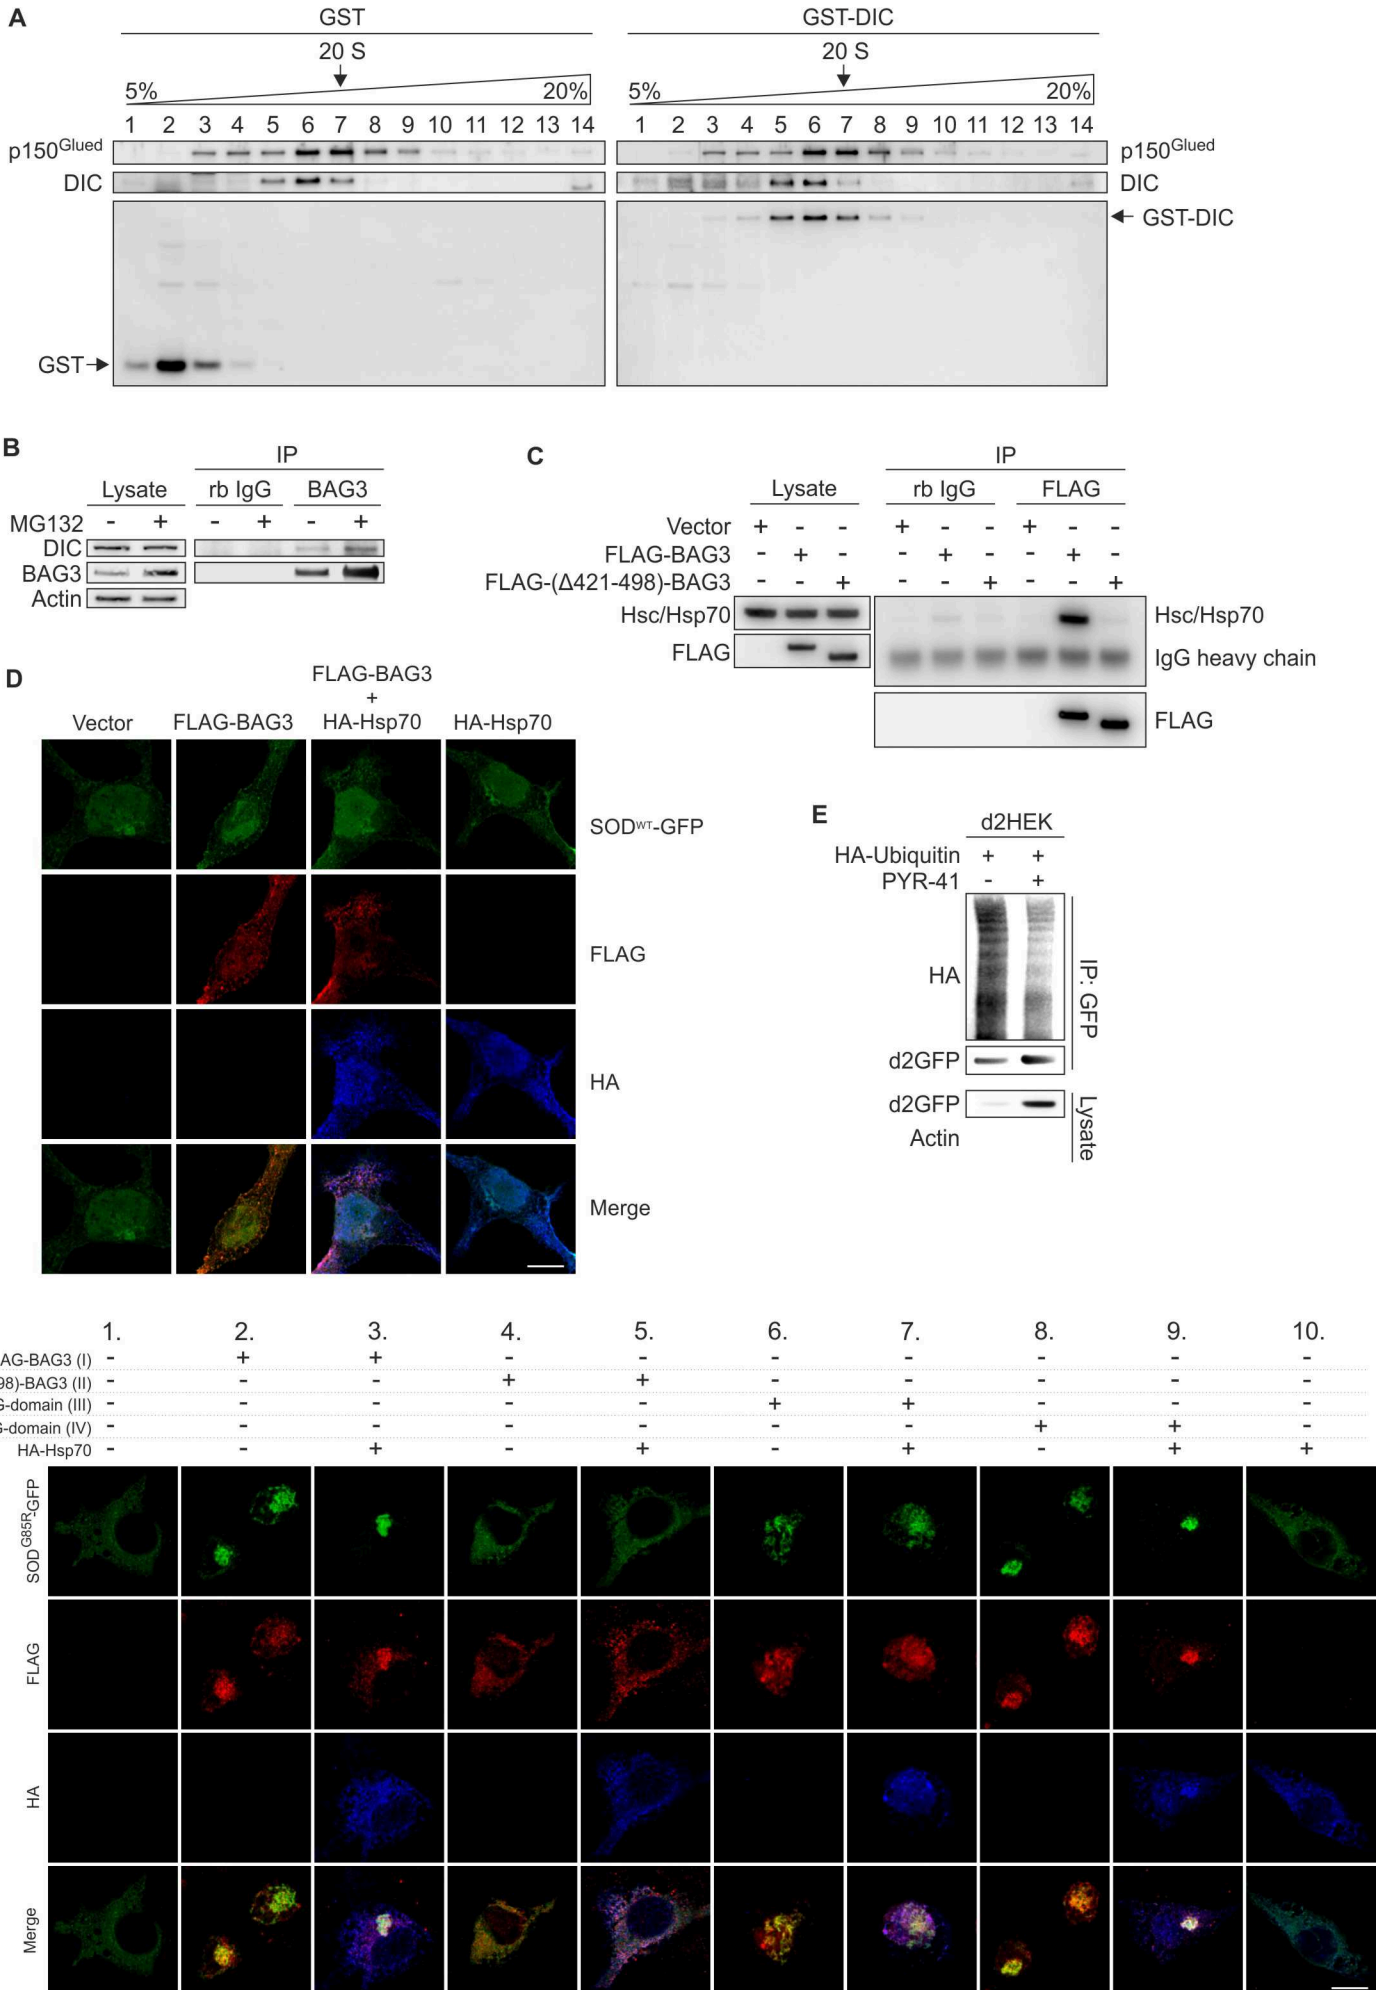

# Figure S3

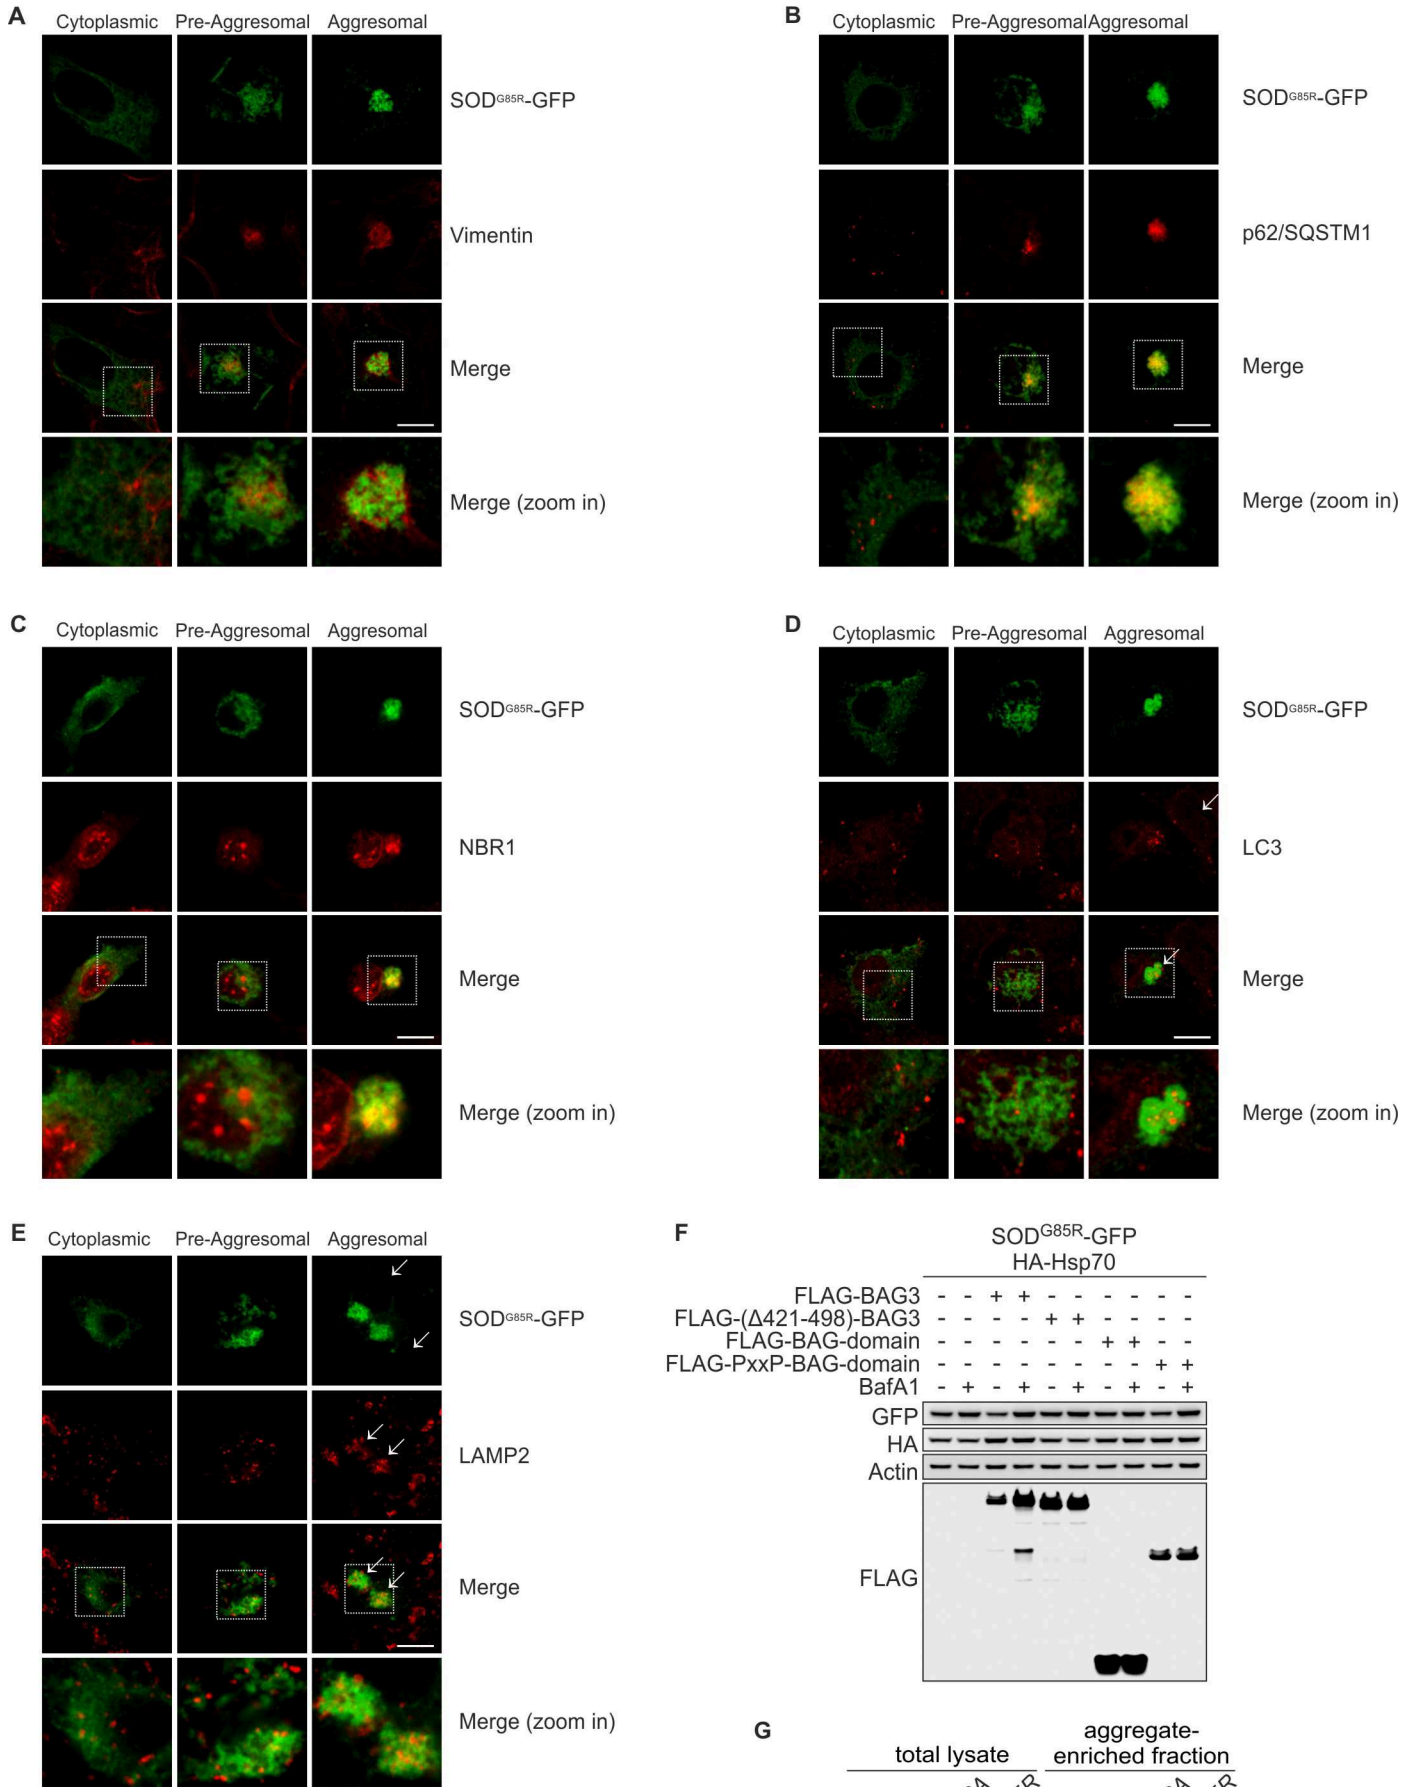

Supplement: embor2010203s1.pdf [file embor2010203s1.pdf]
